# Supplementary material
Source: Springer Nature journal article supplement (https://www.springermedizin.de/resource/supplementary/12890_2013_434_MOESM1_ESM.pdf/9505202)
Supplement: MOESM1 [file 9505202]

# SIADH and CANCER: Diagnostic and Treatment Algorithm

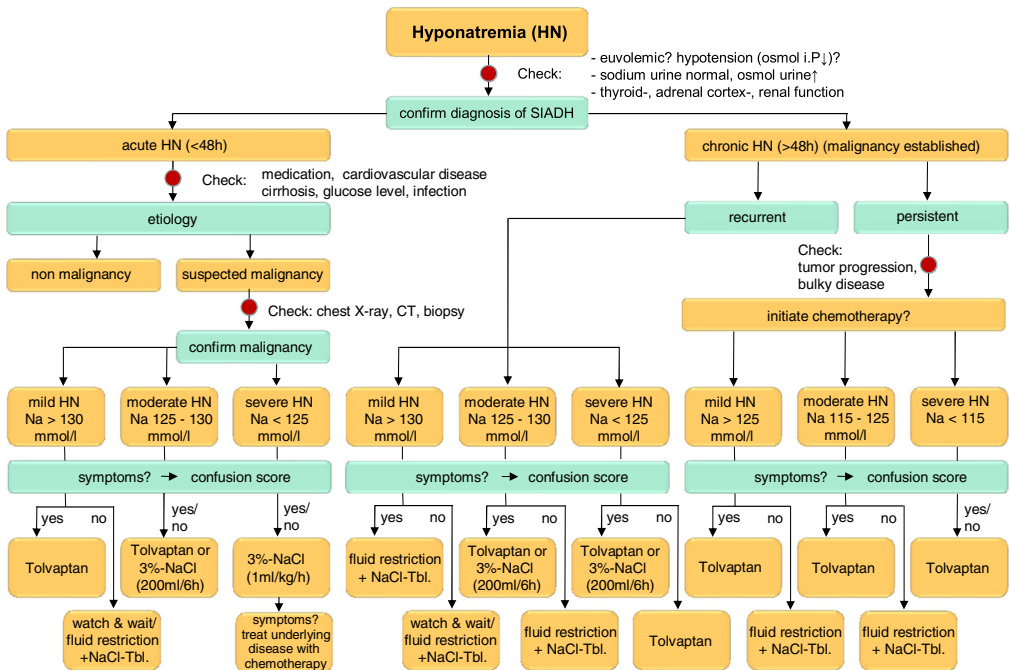

## Control

Infusing 3%-NaCl 1ml/kg/h: monitor serum sodium every 1-2 hours;  
stop as soon symptoms of cerebral edema have resolved  
(do not elevate more than 10-12mmol/l/24h and 18mmol/l/48h)

Infusing 3%-NaCl 200ml/6h: monitor serum sodium after 6 hours;  
stop as soon symptoms of cerebral edema have resolved  
(do not elevate more than 8-10mmol/l/24h and 18mmol/l/48h)

Tolvaptan: monitor serum sodium after 6 hours;  
elevate 3,5-6mmol / Tolvaptan administration
